# Supplementary material for: Body Mass Index (BMI) is not a cancer risk factor for BRCA1/2 carriers: a Systematic Review and Meta-analysis of case-control studies
Source: Research Square preprint supplement (doi:10.21203/rs.3.rs-337397/v1), 2021-03-19
Supplement: Supplementary file 1 [file 3acdaea14340a4f32318dca2.docx]

**Supplementary material**

**Figure S2.** 2009PRISMA checklist for reporting systematic reviews and meta-analyses

**
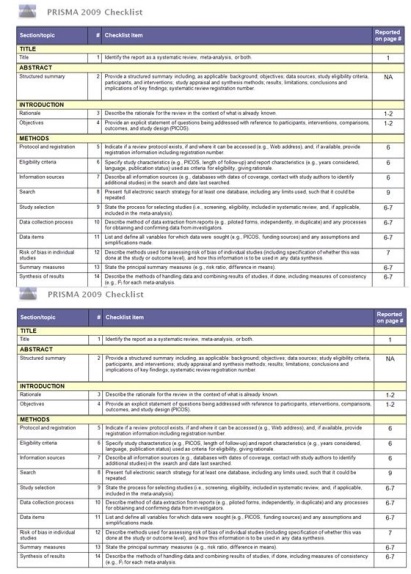
**
